# Supplementary material
Source: HighWire-hosted journal article supplement (http://rc.rcjournal.com/highwire/filestream/11930/field_highwire_adjunct_files/0/RC2456.R2_Contou_Suppl.pdf)
Supplement: RC2456.R2_Contou_Suppl.pdf [file RC2456.R2_Contou_Suppl.pdf]

# NIV Day \_\_\_\_\_

*Patient's sticker*

DATE \_\_\_\_/\_\_\_\_/\_\_\_\_

Physician : \_\_\_\_\_

Nurse day : \_\_\_\_\_

night : \_\_\_\_\_

- **Indication(s):**     COPD     CPE     Obstructive Sleep Apnea     Post-Extubation  
 Pneumonia/ARDS     Obesity/hypoventilation     Other \_\_\_\_\_

- **Humidification :** Heated humidifier (Heat and moisture exchanger with Helmet)

- **NIV initiation** (1<sup>st</sup> session and/or 1<sup>st</sup> session after extubation) :

- YES                  Duration: \_\_\_\_\_h                  Arterial Blood Gas (ABG) under NIV H+1   
 NO

- **Other sessions :**

Minimal number of sessions/day: \_\_\_\_ (6 max)                  Minimal number of hours/day: \_\_\_\_

- Sessions between 0 and 6h:  YES continuously? YES  NO   
 NO

- **Ventilatory mode:**  PSV using NIV mode (Evita 4, XL or Engström)

**Targeted expiratory V<sub>T</sub> between :** |\_|\_| ml and |\_|\_| ml

**Minimal PS level:** |\_|\_| cm H<sub>2</sub>O

BIPAP: high pressure |\_|\_| cm H<sub>2</sub>O    Ti |\_|,|\_| s    RR |\_|\_| /min

ACV: V<sub>T</sub> |\_|\_| ml RR |\_|\_| /min    Inspiratory Flow : 40L/min

- **Objectives : SpO<sub>2</sub> :**     88-92%                   92-96%                   96%-100%

**PEEP**                  |\_|\_| cm H<sub>2</sub>O

- **Settings at initiation of each session**

| All modes        |                                   |
|------------------|-----------------------------------|
| FiO <sub>2</sub> | 30% if O <sub>2</sub> < 3l/min    |
|                  | 50% if O <sub>2</sub> 3-10 l/min  |
|                  | 100% if O <sub>2</sub> > 10 l/min |

| PS mode               |                      |
|-----------------------|----------------------|
| PS level              | 8 cmH <sub>2</sub> O |
| PEEP                  | 0 cmH <sub>2</sub> O |
| Insp. Trigger         | 3 L/min              |
| Max inspiratory. time | 1 sec                |
| Delay Apnea           | 45 sec               |

- **ABG:**     At 8 a.m.     under NIV                   without NIV (>30 min after the last session)  
 Others : \_\_\_\_\_

- **Changes during the day:**

| Name/hour | Prescription |
|-----------|--------------|
|           |              |

**Before each NIV session:**

- Explain to the patient the course of the session
- Apply an artificial skin (Comfeel<sup>®</sup>) over the bridge of the nose to avoid nasal ulceration
- Check that heated humidifier is "on" in "NIV mode"
- Adjust the ventilator settings in accordance with those indicated on the first page
- Evaluate the potential risks before NIV session

**Risky NIV session:** when one of the four criteria is present before NIV session, there is a high risk of intubation and/or cardiac arrest. In this case, the patient must be transferred from the intermediate care unit to the ICU.

**Monitoring codes**

|                   |          |         |                |               |
|-------------------|----------|---------|----------------|---------------|
| <b>Tolerance:</b> | 0 (poor) | 1 (bad) | 2 (acceptable) | 3 (excellent) |
| <b>Leaks:</b>     | 0 (none) | 1 (few) | 2 (many)       | 3 (major)     |

**Settings adjustment:**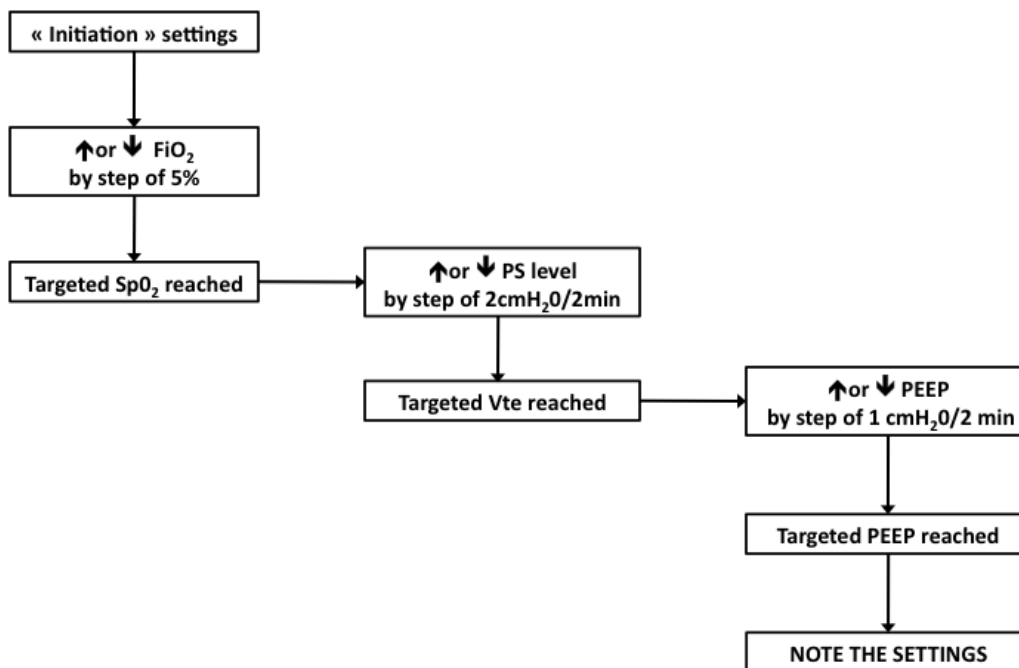**What to do in case of leaks in PS mode?**

1. Adjust mask
2. Reduce PEEP at 2 cmH<sub>2</sub>O
3. Reduce PS level by step of 2 cmH<sub>2</sub>O until the minimal expiratory volume is reached
4. Change the mask
5. Switch to BIPAP mode with:
  - a. Inspiratory time 1 second
  - b. Respiratory rate 10/min
  - c. Start with a high pressure of 8 cm H<sub>2</sub>O and gradually increase by step of 2cmH<sub>2</sub>O to reach the targeted expiratory V<sub>T</sub>

**Session n°**

Evaluation of risks before NIV session

RASS < -2: YES /NO Abundant secretions: YES /NO O<sub>2</sub>>10L/min: YES /NO Nor/epinephrine : YES /NO **Session n°** DATA SUPPLEMENT

Evaluation of risks before NIV session

RASS < -2: YES /NO Abundant secretions: YES /NO O<sub>2</sub>>10L/min: YES /NO Nor/epinephrine : YES /NO **Session n°**

Evaluation of risks before NIV session

RASS < -2: YES /NO Abundant secretions: YES /NO O<sub>2</sub>>10L/min: YES /NO Nor/epinephrine : YES /NO **Monitoring:**

| Hour                      | __H__   |
|---------------------------|---------|---------|---------|---------|---------|---------|---------|---------|---------|---------|---------|---------|
| RASS                      |         |         |         |         |         |         |         |         |         |         |         |         |
| BP                        |         |         |         |         |         |         |         |         |         |         |         |         |
| HR                        |         |         |         |         |         |         |         |         |         |         |         |         |
| RR                        |         |         |         |         |         |         |         |         |         |         |         |         |
| SpO <sub>2</sub>          |         |         |         |         |         |         |         |         |         |         |         |         |
| FiO <sub>2</sub>          |         |         |         |         |         |         |         |         |         |         |         |         |
| PS level                  |         |         |         |         |         |         |         |         |         |         |         |         |
| PEEP level                |         |         |         |         |         |         |         |         |         |         |         |         |
| V <sub>T</sub> expiratory |         |         |         |         |         |         |         |         |         |         |         |         |
| V <sub>E</sub> (L/min)    |         |         |         |         |         |         |         |         |         |         |         |         |
| Tolerance                 | 0-1-2-3 | 0-1-2-3 | 0-1-2-3 | 0-1-2-3 | 0-1-2-3 | 0-1-2-3 | 0-1-2-3 | 0-1-2-3 | 0-1-2-3 | 0-1-2-3 | 0-1-2-3 | 0-1-2-3 |
| Leaks                     | 0-1-2-3 | 0-1-2-3 | 0-1-2-3 | 0-1-2-3 | 0-1-2-3 | 0-1-2-3 | 0-1-2-3 | 0-1-2-3 | 0-1-2-3 | 0-1-2-3 | 0-1-2-3 | 0-1-2-3 |

**NIV tolerance:**

Duration of the session: \_\_\_\_\_

Premature NIV disconnection for intolerance:

NO  YES 

Hypoxemia after NIV disconnection:

NO  YES  with SpO<sub>2</sub>: |\_\_|\_\_| %

Tested masks:

The best: \_\_\_\_\_

The worst: \_\_\_\_\_

Why? Leaks YES  NO Pain YES  NO **NIV tolerance:**

Duration of the session: \_\_\_\_\_

Premature NIV disconnection for intolerance:

NO  YES 

Hypoxemia after NIV disconnection:

NO  YES  with SpO<sub>2</sub>: |\_\_|\_\_| %

Tested masks:

The best: \_\_\_\_\_

The worst: \_\_\_\_\_

Why? Leaks YES  NO Pain YES  NO 

Copyright (C) 2013 Daedalus Enterprises

**NIV tolerance:**

Duration of the session: \_\_\_\_\_

Premature NIV disconnection for intolerance:

NO  YES 

Hypoxemia after NIV disconnection:

NO  YES  with SpO<sub>2</sub>: |\_\_|\_\_| %

Tested masks:

The best: \_\_\_\_\_

The worst: \_\_\_\_\_

Why? Leaks YES  NO Pain YES  NO

**Session n°**

Evaluation of risks before NIV session

RASS < -2: YES /NO Abundant secretions: YES /NO O<sub>2</sub>>10L/min: YES /NO Nor/epinephrine : YES /NO **Session n°**

ONLINE DATA SUPPLEMENT

Evaluation of risks before NIV session

RASS < -2: YES /NO Abundant secretions: YES /NO O<sub>2</sub>>10L/min: YES /NO Nor/epinephrine : YES /NO **Session n°**

Evaluation of risks before NIV session

RASS < -2: YES /NO Abundant secretions: YES /NO O<sub>2</sub>>10L/min: YES /NO Nor/epinephrine : YES /NO **Monitoring:**

| Hour                      | __H__   |
|---------------------------|---------|---------|---------|---------|---------|---------|---------|---------|---------|---------|---------|---------|
| RASS                      |         |         |         |         |         |         |         |         |         |         |         |         |
| BP                        |         |         |         |         |         |         |         |         |         |         |         |         |
| HR                        |         |         |         |         |         |         |         |         |         |         |         |         |
| RR                        |         |         |         |         |         |         |         |         |         |         |         |         |
| SpO <sub>2</sub>          |         |         |         |         |         |         |         |         |         |         |         |         |
| FiO <sub>2</sub>          |         |         |         |         |         |         |         |         |         |         |         |         |
| PS level                  |         |         |         |         |         |         |         |         |         |         |         |         |
| PEEP level                |         |         |         |         |         |         |         |         |         |         |         |         |
| V <sub>T</sub> expiratory |         |         |         |         |         |         |         |         |         |         |         |         |
| V <sub>E</sub> (L/min)    |         |         |         |         |         |         |         |         |         |         |         |         |
| Tolerance                 | 0-1-2-3 | 0-1-2-3 | 0-1-2-3 | 0-1-2-3 | 0-1-2-3 | 0-1-2-3 | 0-1-2-3 | 0-1-2-3 | 0-1-2-3 | 0-1-2-3 | 0-1-2-3 | 0-1-2-3 |
| Leaks                     | 0-1-2-3 | 0-1-2-3 | 0-1-2-3 | 0-1-2-3 | 0-1-2-3 | 0-1-2-3 | 0-1-2-3 | 0-1-2-3 | 0-1-2-3 | 0-1-2-3 | 0-1-2-3 | 0-1-2-3 |

**NIV tolerance:**

Duration of the session: \_\_\_\_\_

Premature NIV disconnection for intolerance:

NO  YES 

Hypoxemia after NIV disconnection:

NO  YES  with SpO<sub>2</sub>: |\_\_|\_\_| %

Tested masks:

The best: \_\_\_\_\_

The worst: \_\_\_\_\_

Why? Leaks YES  NO Pain YES  NO **NIV tolerance:**

Duration of the session: \_\_\_\_\_

Premature NIV disconnection for intolerance:

NO  YES 

Hypoxemia after NIV disconnection:

NO  YES  with SpO<sub>2</sub>: |\_\_|\_\_| %

Tested masks:

The best: \_\_\_\_\_

The worst: \_\_\_\_\_

Why? Leaks YES  NO Pain YES  NO **NIV tolerance:**

Duration of the session: \_\_\_\_\_

Premature NIV disconnection for intolerance:

NO  YES 

Hypoxemia after NIV disconnection:

NO  YES  with SpO<sub>2</sub>: |\_\_|\_\_| %

Tested masks:

The best: \_\_\_\_\_

The worst: \_\_\_\_\_

Why? Leaks YES  NO Pain YES  NO
